# Supplementary material
Source: PubMed Central journal article supplement (PMC2538622)

## Supplemental Figure legend

Generation of Narp knock out mice. A. Genomic DNA structure and targeted allele with restriction enzyme sites (E: EcoRI). Black boxes indicate exons and exon numbers are indicated. Neo resistance cassette ( $Neo^r$ ) replaced exon 2, resulting in out-of frame mutation in the Narp gene. The fragment used for targeting vector is indicated by arrows. The probe site for Southern blot analysis is indicated by a bar. B. Homologous recombination was confirmed by Southern blot analysis using wild (+/+) and mutant (-/-) genomic DNA. C. Western blot analysis of whole brain extracts.

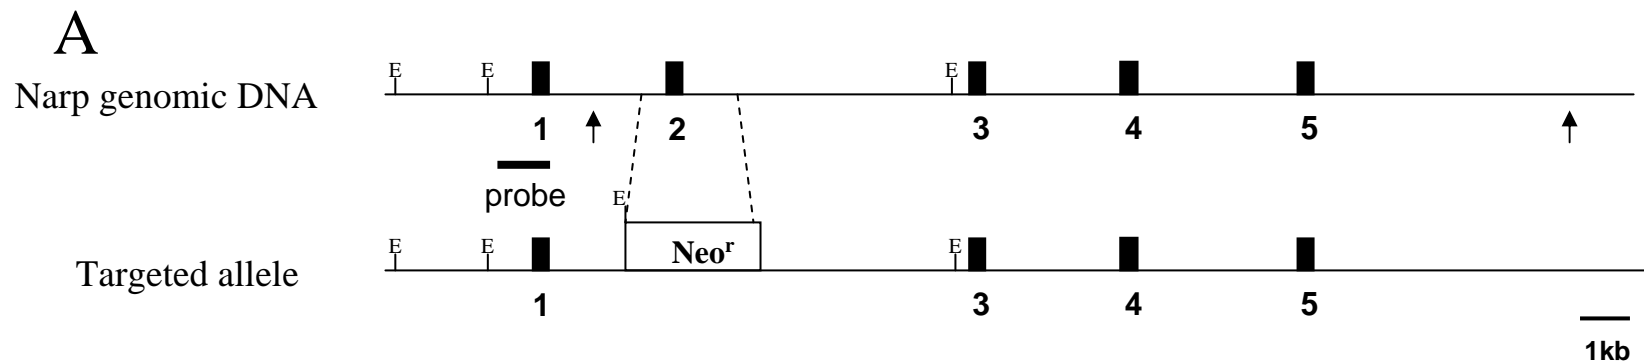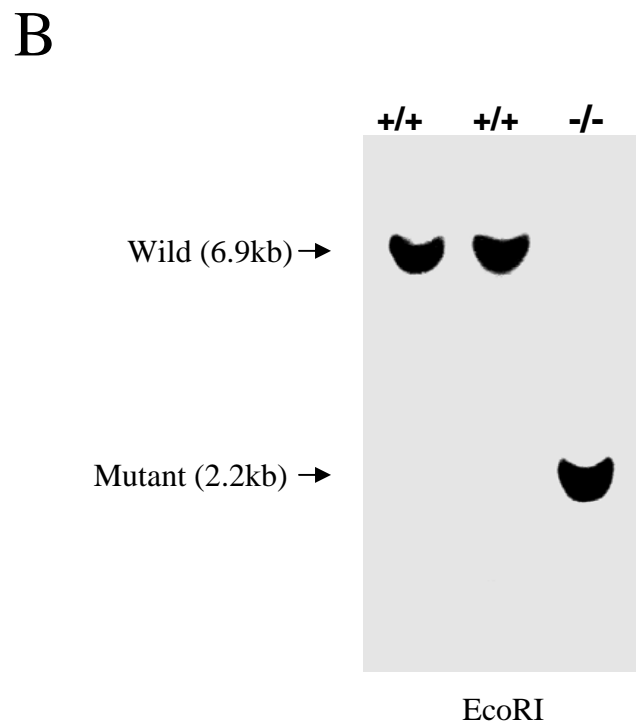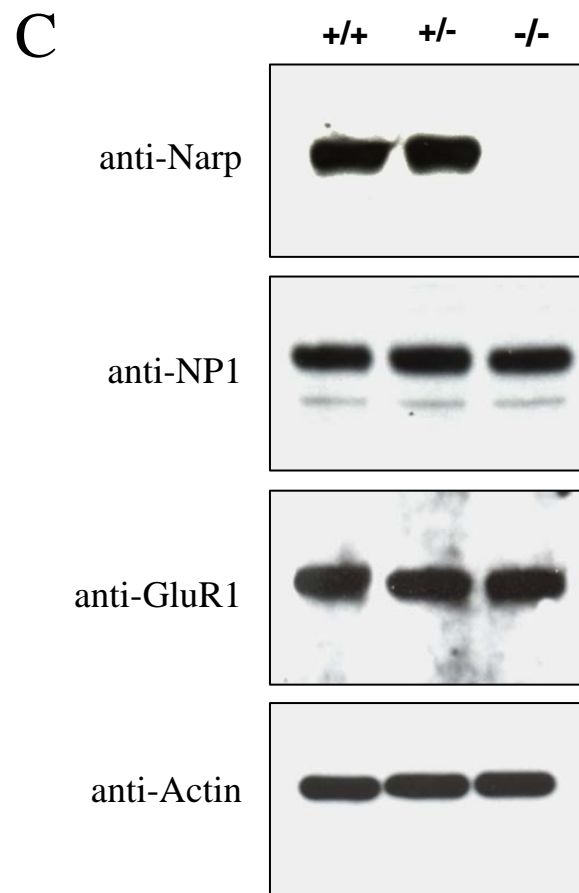

Supplement: NIHMS48355-supplement-sup_data.pdf [file NIHMS48355-supplement-sup_data.pdf]
